# Supplementary material for: Xenogeneic silencing strategies in bacteria are dictated by RNA polymerase promiscuity
Source: PubMed Central journal article supplement (PMC8894471; doi:10.1038/s41467-022-28747-1), 2022-03-03
Supplement: 41467_2022_28747_MOESM1_ESM.pdf [file 41467_2022_28747_MOESM1_ESM.pdf]

**a**

# Supplementary Figure 1

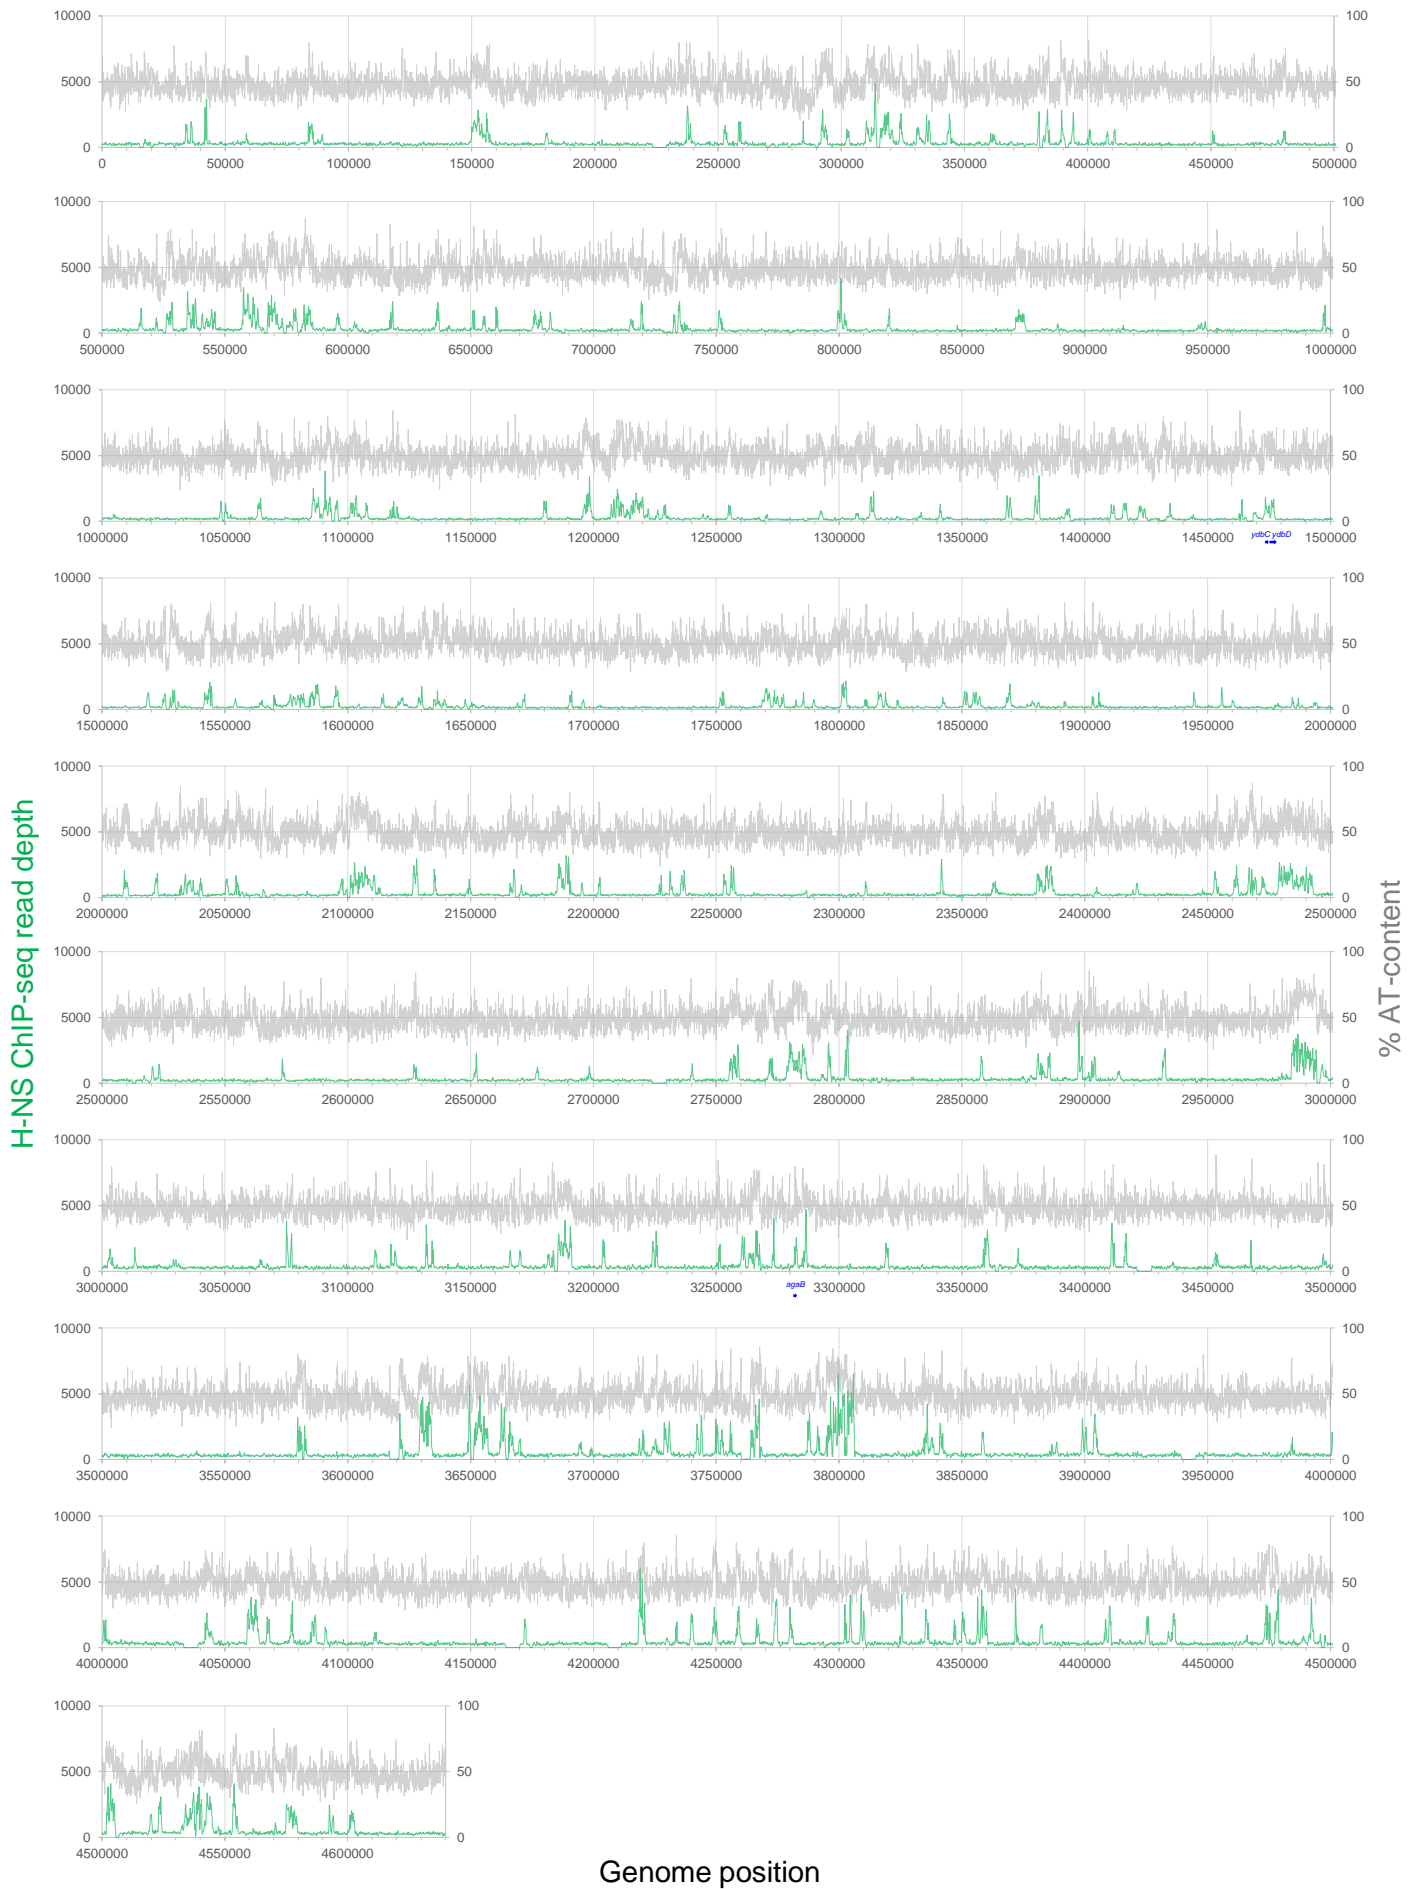

**b**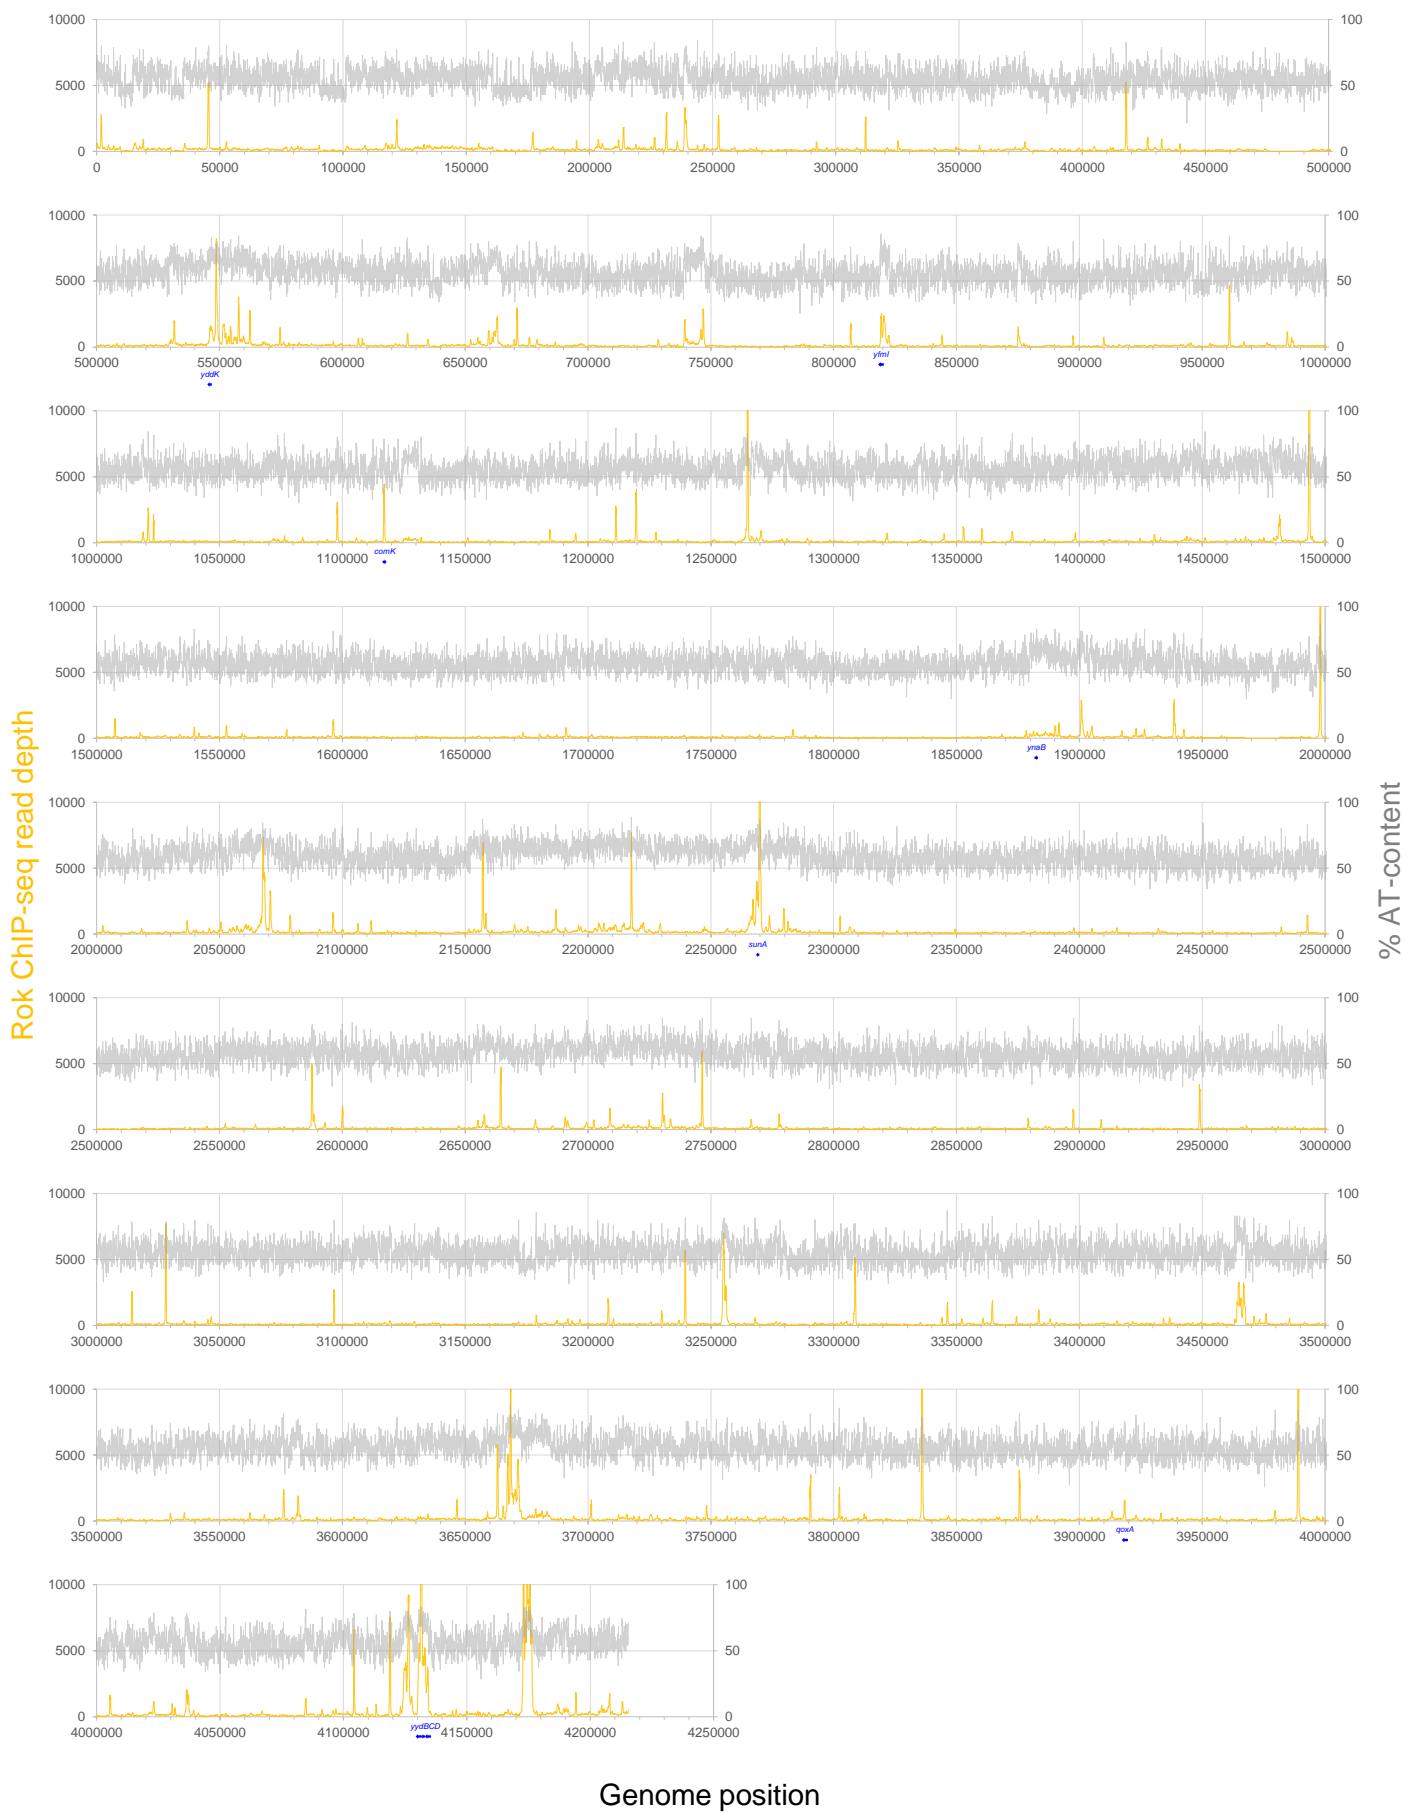

**c**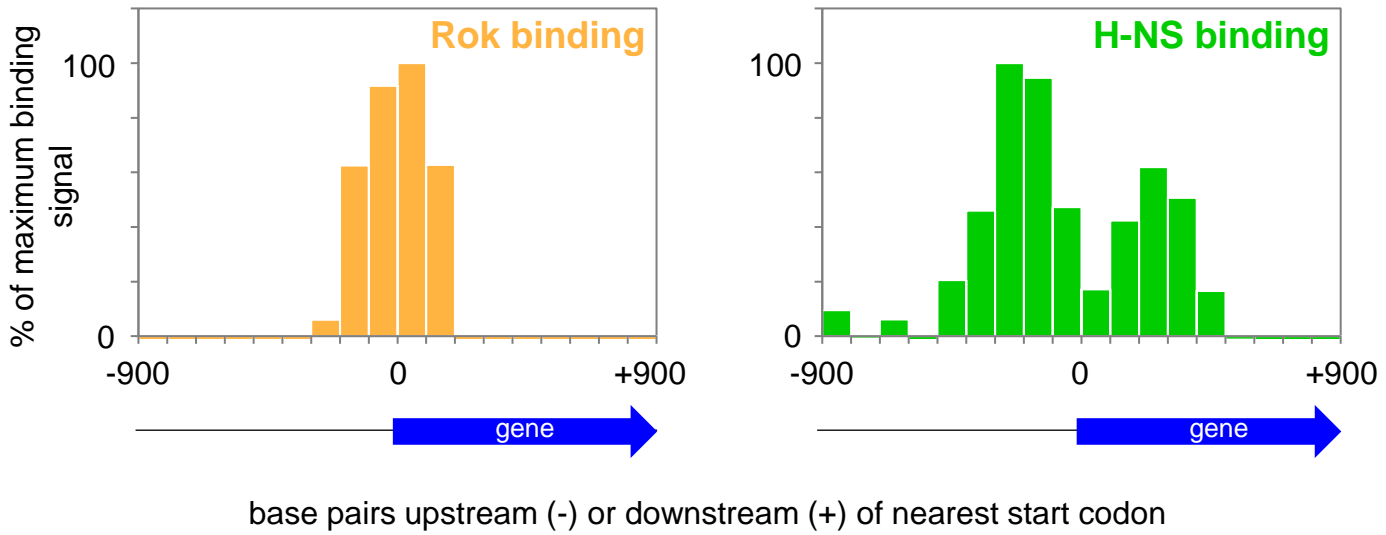**d**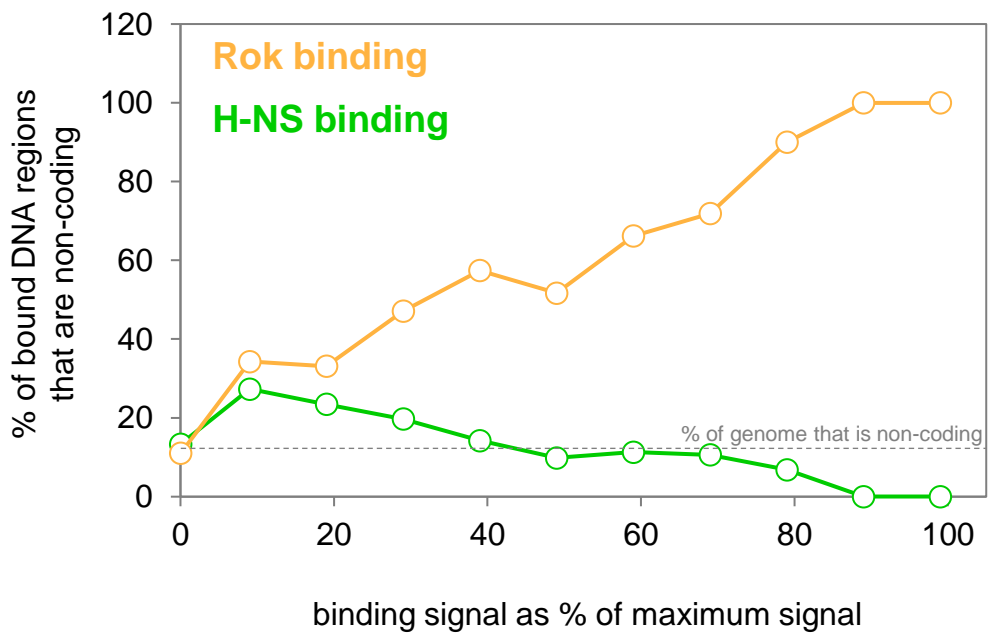

**Supplementary Figure 1: *E. coli* H-NS and *B. subtilis* Rok exhibit different patterns of DNA binding *in vivo*.**

a) Genome-wide distribution of H-NS in *E. coli*. The H-NS ChIP-seq binding signal (green) and DNA AT-content (grey) were averaged across non-overlapping 70 bp bins and plotted against genome position. The H-NS target genes examined in this study are marked by blue arrows and labelled. Note that the H-NS ChIP-seq data were originally mapped against version U00096.2 of the *E. coli* genome<sup>32</sup>. Hence, we have used these coordinates in this figure panel only.

b) Genome-wide distribution of Rok in *E. coli*. The Rok ChIP-seq binding signal (orange)<sup>35</sup> and DNA AT-content (grey) were averaged across non-overlapping 70 bp bins and plotted against genome position. The Rok target genes examined in this study are marked by blue arrows and labelled.

c) Aggregate distribution of Rok (orange) and H-NS (green) binding signals genome-wide with respect to gene start codons. The ChIP-seq data<sup>32,35</sup> were averaged in 10 bp bins across the chromosome and the average signal across all bins was subtracted from each individual bin to remove background. The distance between each bin and the nearest gene start codon in the genome was then determined. Each bar shows the sum of all bins in sequential 100 bp windows upstream (-) or downstream (+) of a start codon. To aid comparison, data are presented as a % of the maximum signal for each experiment.

d) Relationship between Rok (orange) or H-NS (green) binding signal and non-coding DNA. The ChIP-seq data<sup>32,35</sup> were averaged in 10 bp bins across the chromosome. We then calculated the % of bins in non-coding DNA above different binding signal thresholds (shown as a percentage of the maximum binding signal). The dashed line indicates the approximate percentage of each genome that is non-coding. The absolute values are 13 % and 11 % for *E. coli* and *B. subtilis* respectively.

# Supplementary Figure 2

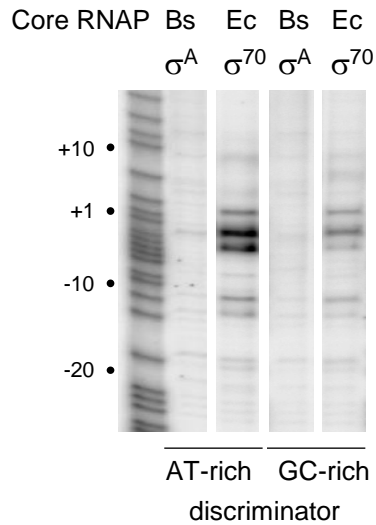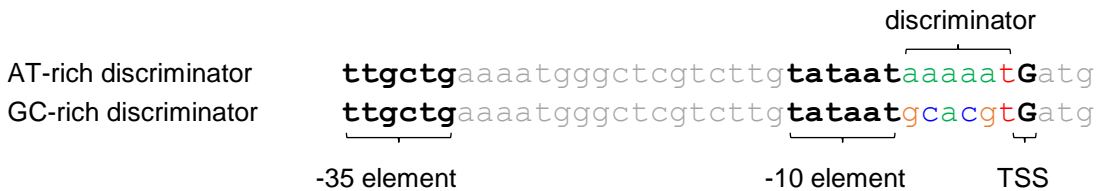

**Supplementary Figure 2: Promoter discriminator sequence impacts DNA opening by *E. coli*  $\sigma^{70}$  and *B. subtilis*  $\sigma^A$  RNA polymerase differently.** The gel image shows  $\text{KMnO}_4$  reactivity patterns due to DNA opening by *E. coli* (Ec)  $\sigma^{70}$ , or *B. subtilis* (Bs)  $\sigma^A$ , RNA polymerase holoenzyme (0.5  $\mu\text{M}$ ) at the promoter sequences shown. The gel is calibrated with a Maxam-Gilbert G+A sequencing reaction. The experiment was done twice with similar results.

# Supplementary Figure 3

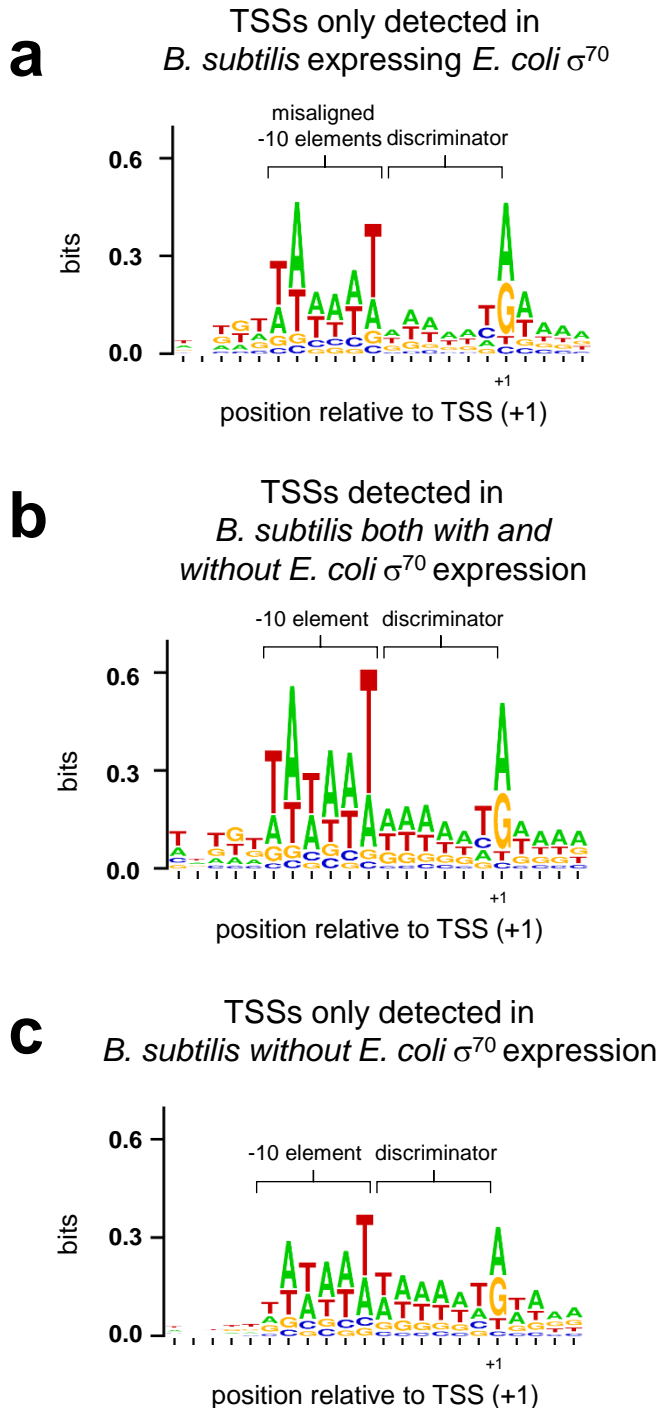

**Supplementary Figure 3: *B. subtilis* transcription start sites dependent on *E. coli*  $\sigma^{70}$  have promoters that more closely resemble those identified in *E. coli*.**

a) Positioning of promoter -10 elements and transcription start sites in *E. coli* and *B. subtilis*. The bar charts show the percentage of promoter -10 elements located at indicated distances upstream of transcription start sites identified by capable-seq for *E. coli* and *B. subtilis*.

b) The panel shows DNA sequence logos generated by aligning nucleic acid regions upstream *B. subtilis* transcription start sites dependent on  $\sigma^{70}$  (left) to those also identified in the absence of  $\sigma^{70}$  (right). The more variable spacing between transcription start sites and promoter -10 elements at  $\sigma^{70}$  dependent promoters generates a motif that misrepresents the consensus -10 element sequence (5'-TATAAT-3'). The promoter discriminator sequence is less AT-rich at promoters used only by  $\sigma^{70}$ .

# Supplementary Figure 4

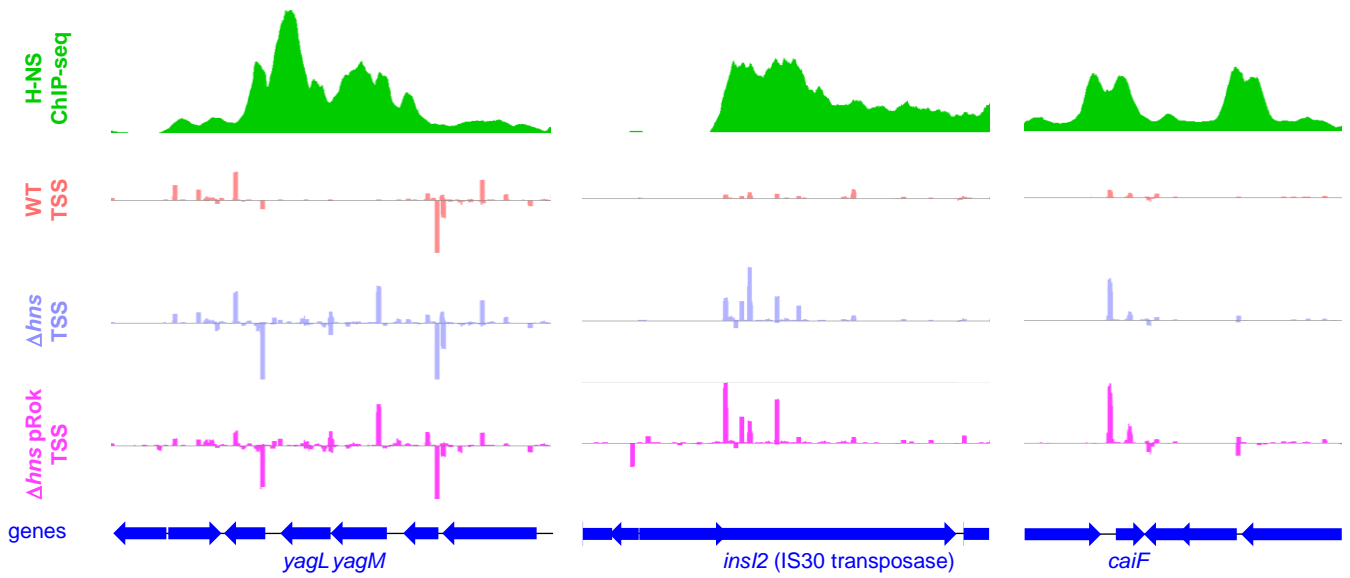

**Supplementary Figure 4: Rok cannot compensate for loss of *hns* in *E. coli*.** Three genomic regions subject to silencing by H-NS are shown. Data for H-NS occupancy are shown by the green graph<sup>32</sup>. Transcription start sites (TSSs) were identified by cappable-seq for wild type,  $\Delta hns$ , or  $\Delta hns$  cells carrying plasmid pRok. In the cappable-seq data only RNA 5' ends are sequenced and so the upstream edge of each peak indicates a TSS. Sequence reads mapping to the top and bottom DNA strands are shown above and below the central horizontal line in each plot. Genes are shown by blue arrows.

# Supplementary Figure 5

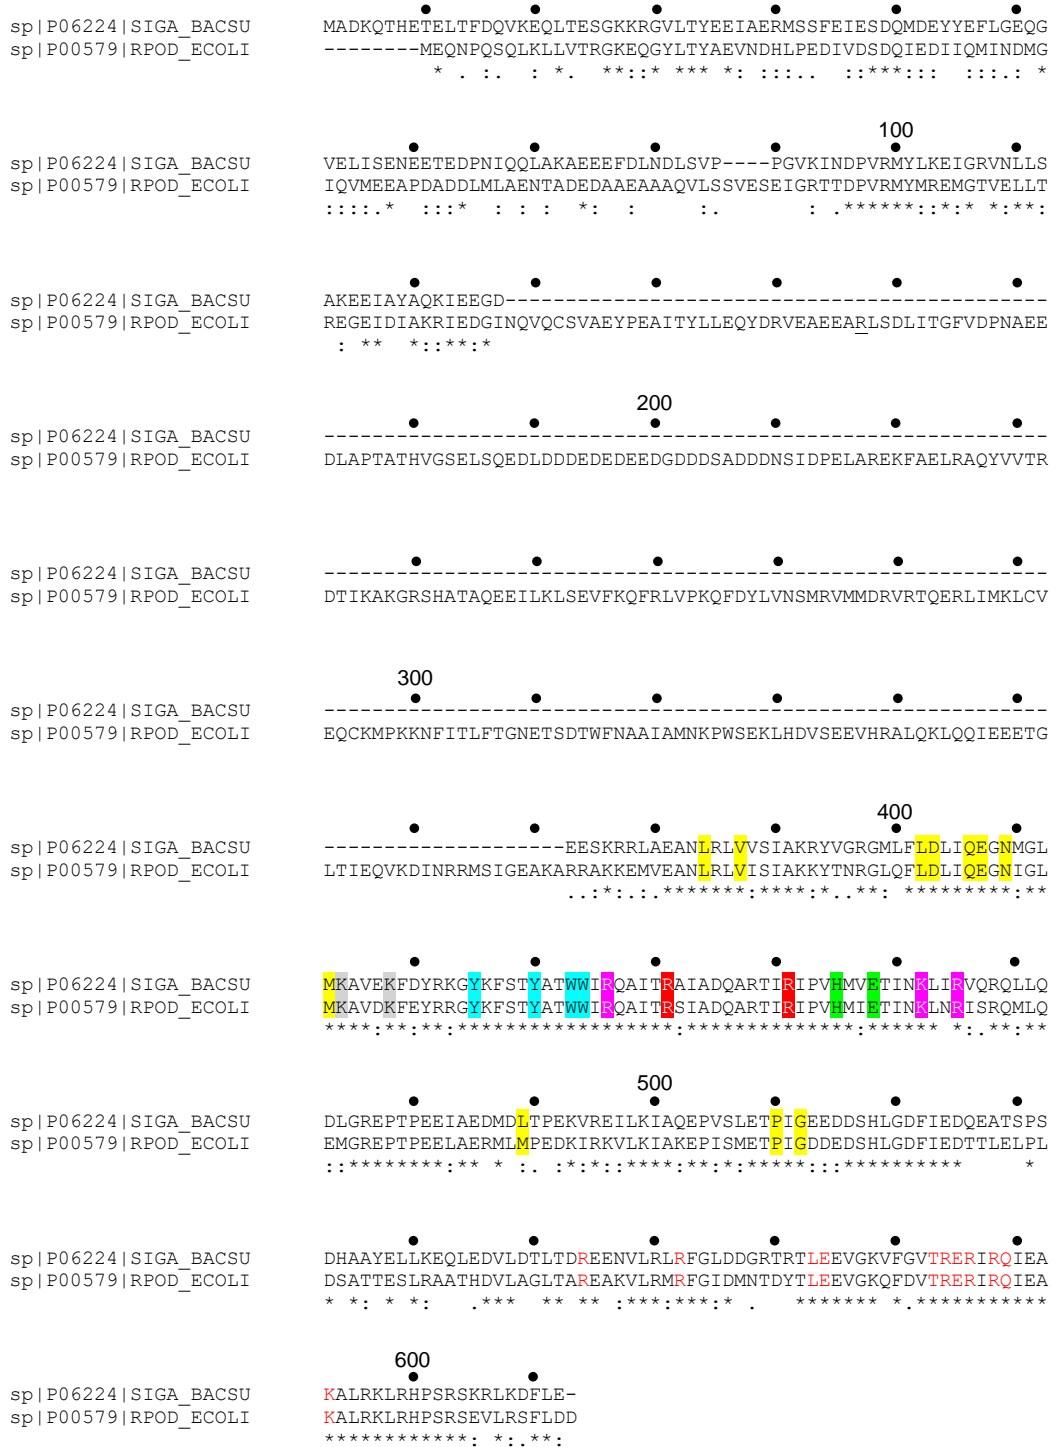

Numbering with respect to *E. coli*  $\sigma^{70}$

-35 element contacts

core RNAP recognition

extended -10

-10 element (open complex)

Contacts upstream of the -10 element

-10 element closed complex

Supplementary Figure 5: Alignment of the *B. subtilis*  $\sigma^A$  and *E. coli*  $\sigma^{70}$  amino acid sequences.



# Supplementary Figure 6

**a**

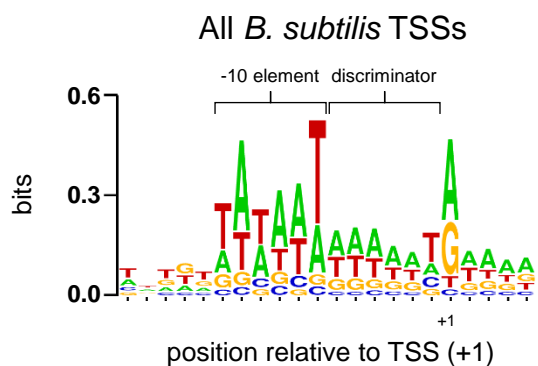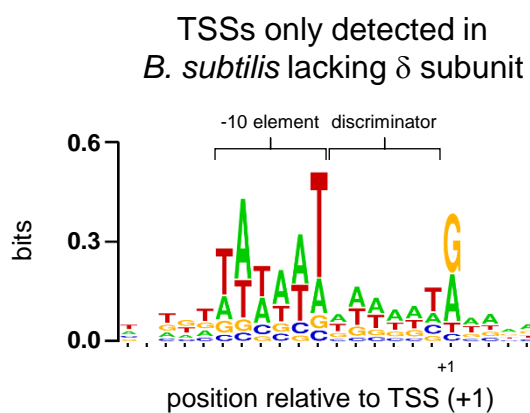

**b**

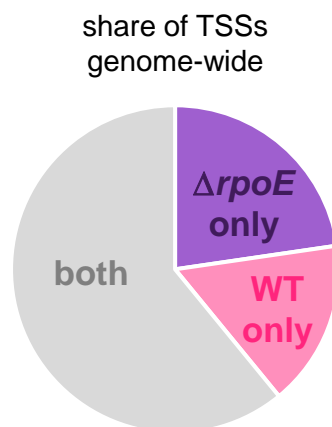

share of TSSs in Rok bound AT-rich islands

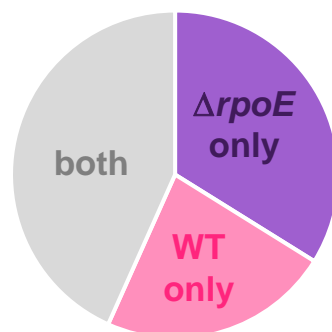

**c**

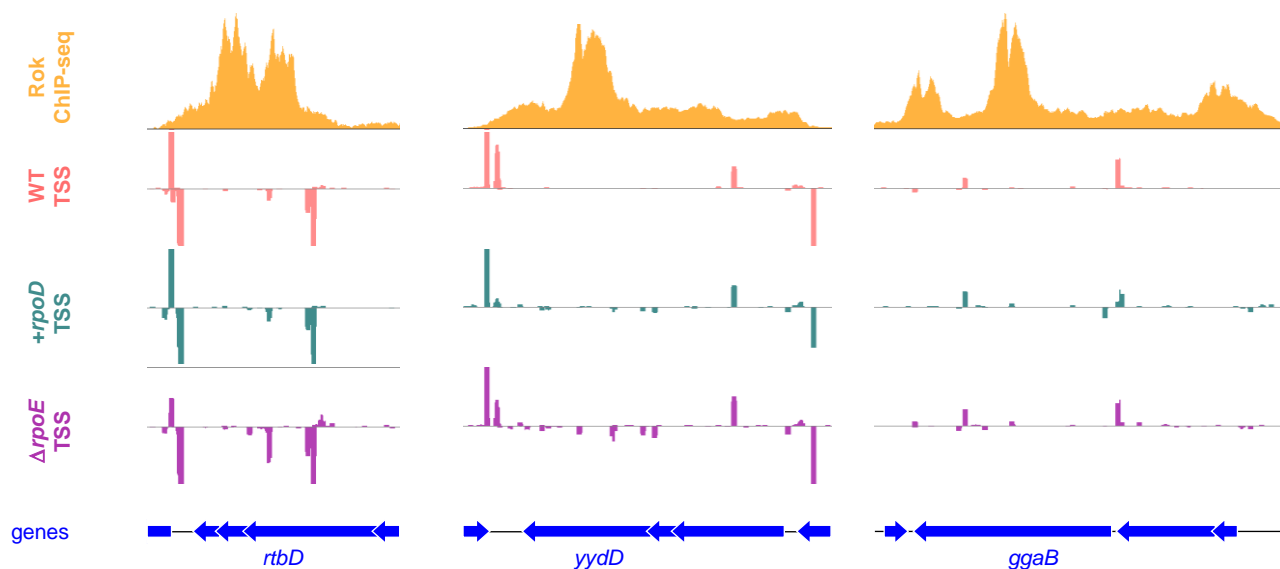

**Supplementary Figure 6: Loss of the *B. subtilis* RNA polymerase  $\delta$  subunit leads to increased promiscuous transcription of horizontally acquired DNA.**

- a) The panel shows DNA sequence logos generated by aligning nucleic acid regions upstream of all *B. subtilis* transcription start sites (top) and those only detected following deletion of *rpoE* encoding the RNA polymerase  $\delta$  subunit (bottom). Note the change in sequence at the +1 position.
- b) The pie charts show distribution of *B. subtilis* TSSs identified only in the absence of *rpoE*, only in wild type cells, or in both genetic backgrounds. Those TSSs only detected in the absence of *rpoE*, encoding the RNA polymerase  $\delta$  subunit, are overrepresented in horizontally acquired AT-rich sections of DNA targeted by Rok.
- c) Three Rok targeted genomic regions are shown. Data for Rok occupancy are shown by the orange graph<sup>35</sup>. Transcription start sites (TSSs) were identified by cappable-seq for wild type, *rpoD+*, or  $\Delta rpoE$  cells. In the cappable-seq data only RNA 5' ends are sequenced and so the upstream edge of each peak indicates a TSS. Sequence reads mapping to the top and bottom DNA strands are shown above and below the central horizontal line in each plot. Genes are shown by blue arrows.

# Supplementary Figure 7

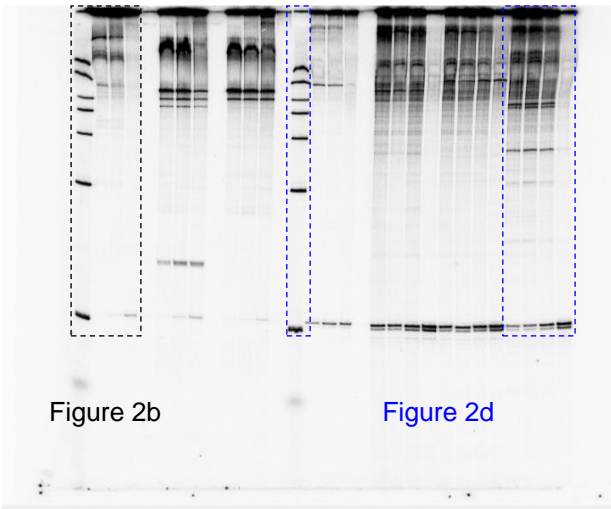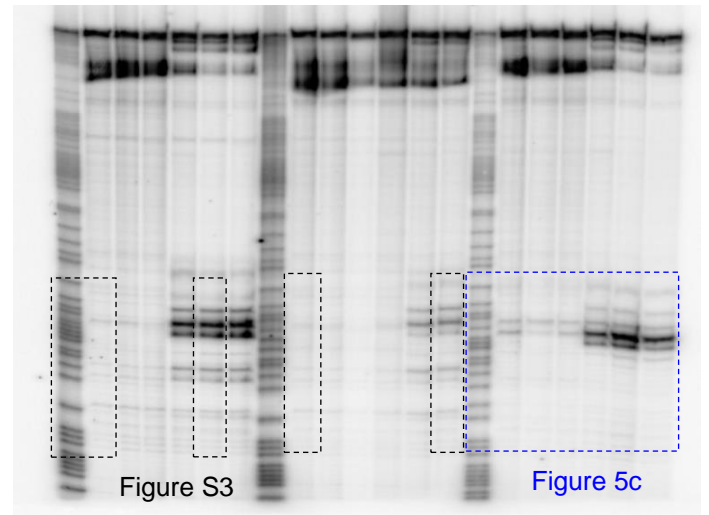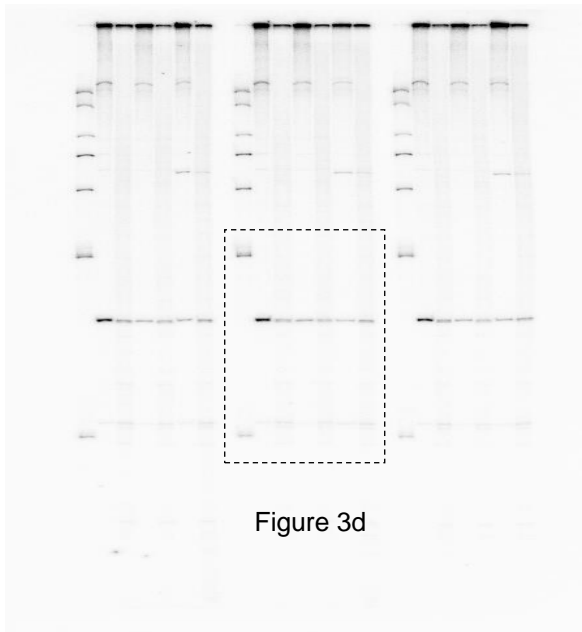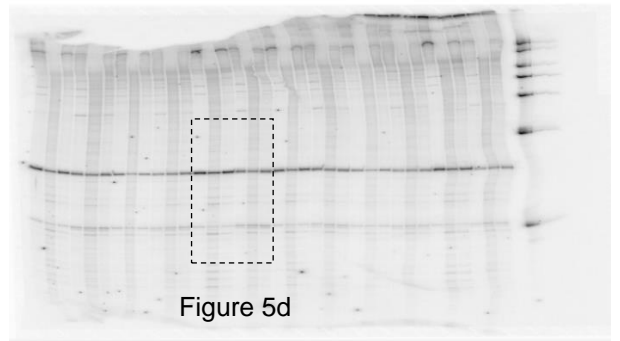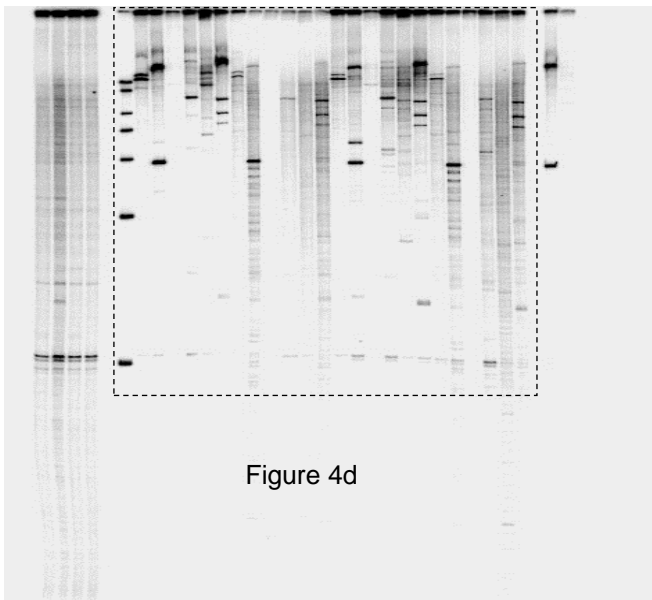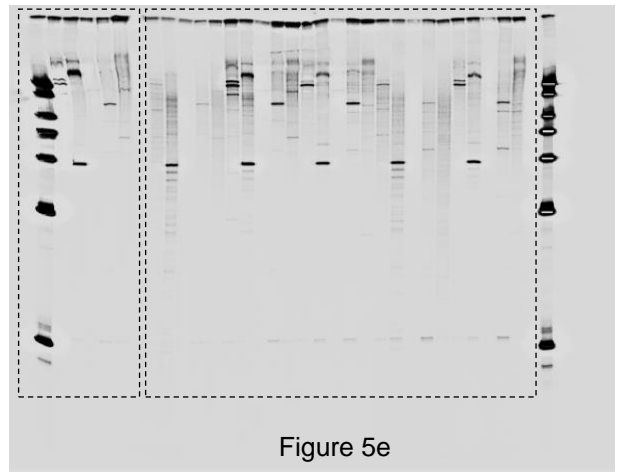

**Supplementary Figure 7: Original gel images.** Sections of gel images used in figures are boxed, labelled, and where necessary colour coded, for clarity.

**Supplementary Table 1:** Strains, plasmids, synthesised gene strands and oligonucleotides

| Name                                               | Description                                                                                                                                                                           | Source     |
|----------------------------------------------------|---------------------------------------------------------------------------------------------------------------------------------------------------------------------------------------|------------|
| <i>Bacillus subtilis</i> strains                   |                                                                                                                                                                                       |            |
| 168ca                                              | <i>trpC2</i>                                                                                                                                                                          | 13         |
| $\Delta rok$                                       | <i>trpC2</i> $\Delta rok::kan$                                                                                                                                                        | 14         |
| $\Delta rpoE$                                      | <i>trpC2</i> $\Delta rpoE::kan$                                                                                                                                                       | 14         |
| <i>rpoD+</i>                                       | <i>trpC2 amyE::Phyperspank rpoD</i> (spec)                                                                                                                                            | This work  |
| <i>Escherichia coli</i> strains                    |                                                                                                                                                                                       |            |
| DH5 $\alpha$                                       | <i>fhuA2</i> $\Delta(argF-lacZ)$ U169 <i>phoA glnV44</i> $\Phi 80$ $\Delta(lacZ)$ M15<br><i>gyrA96 recA1 relA1 endA1 thi-1 hsdR17</i>                                                 | NEB        |
| MG1655                                             | K-12 F- $\lambda-$ <i>ilvG-</i> <i>rfb-50 rph-1</i>                                                                                                                                   | 15         |
| $\Delta hns$                                       | K-12 F- $\lambda-$ <i>ilvG-</i> <i>rfb-50 rph-1</i> $\Delta hns::kan$                                                                                                                 | 16         |
| Plasmids                                           |                                                                                                                                                                                       |            |
| pSR                                                | pBR322-derived plasmid. Features cloning site upstream<br>$\lambda$ oop transcription terminator. AmpR                                                                                | 17         |
| pDR111                                             | IPTG inducible Phyperspank promoter and specR cassette<br>flanked by amyE sequences for chromosomal integration.<br>AmpR                                                              | 1          |
| pRok                                               | pUC19 derivative encoding <i>B. subtilis rok</i> under the control of<br>the <i>E. coli hns</i> promoter. AmpR                                                                        | This work  |
| pET-28a                                            | For T7 based, IPTG induced expression of N-terminal His tag<br>fusion protein. KanR.                                                                                                  | Novagen    |
| pET-21a                                            | For T7 based, IPTG induced expression of C-terminal His tag<br>fusion protein. AmpR.                                                                                                  | Novagen    |
| Synthesised gene fragments (5' to 3') <sup>1</sup> |                                                                                                                                                                                       |            |
| pVeg                                               | <u>CACGGCGAATTCTCCATCCTCTCAGAGCTCACATTTATTTGA</u><br><u>CAAAAATGGGCTCGTGTGTACAAATAAATGT</u> <b>A</b> GTGCTCGCTT<br>TACGTCACCTGCTTCAGCTCTCACATAAGGAGGAACTACCAT<br>GAATGTGAAGCTTTTATCC  | This study |
| pVeg AT                                            | <u>CACGGCGAATTCTCCATCCTCTCAGAGCTCACATTTATTTGC</u><br><u>TGAAAATGGGCTCGTCTTGTATAATAAAAAAT</u> <b>G</b> ATGCTCGCTT<br>TACGTCACCTGCTTCAGCTCTCACATAAGGAGGAACTACCAT<br>GAATGTGAAGCTTTTATCC | This study |
| pVeg GC                                            | <u>CACGGCGAATTCTCCATCCTCTCAGAGCTCACATTTATTTGC</u><br><u>TGAAAATGGGCTCGTCTTGTATAATGCACGT</u> <b>G</b> ATGCTCGCTT                                                                       | This study |

|               |                                                                                                                                                                |            |
|---------------|----------------------------------------------------------------------------------------------------------------------------------------------------------------|------------|
|               | TACGTCACCTGCTTCAGCTCTCACATAAGGAGGAACTACCAT<br>GAATGTGAAGCTTTTATCC                                                                                              |            |
| pVeg GC +1bp  | CACGGCGAATTCTCCATCCTCTCAGAGCTCACATTTATTTGC<br>TGAAAATGGGCTCGTCTTGTATAATCGCACGTGATGCTCGCT<br>TTACGTCACCTGCTTCAGCTCTCACATAAGGAGGAACTACCA<br>TGAATGTGAAGCTTTTATCC | This study |
|               | Oligonucleotides (5' to 3') <sup>2</sup>                                                                                                                       |            |
| pSR pVeg F    | gaggaactaccatgaatgtgAAGCTTTTATCCACTCCCCATC<br>CCCTCCAGTAATG                                                                                                    | This study |
| pSR pVeg R    | gtgagctctgagaggatggaGAATTCGCCGTGTTGAAGACGA<br>AAGGGCCTCGTGA                                                                                                    | This study |
| pSR F_HindIII | AAGCTTACTCCCCATCCCCTC                                                                                                                                          | This study |
| pSR R_EcoRI   | GAATTCCTTGAAGACGAAAGGGCC                                                                                                                                       | This study |
| sunA pSR F    | cctttcgtcttcaagaattcTTTTTAAATGGAGCTCAACAAT<br>TTATTC                                                                                                           | This study |
| sunA pSR R    | aggggatggggagtaagcttTTATCTGCAGAATTGACG                                                                                                                         | This study |
| agaB pSR F    | atcacgaggccctttcgtcttcaagaattcCACAAAAGTGAA<br>CGTTGCCAC                                                                                                        | This study |
| agaB pSR R    | tcattactggaggggatggggagtaagcttTAGTCAGGGAT<br>TTGTTCTTTTTG                                                                                                      | This study |
| gmuB pSR F    | gaggccctttcgtcttcaagaattcAGGAAAACCTTGAAATT<br>CATAAC                                                                                                           | This study |
| gmuB pSR R    | actggaggggatggggagtaagcttTTATTGATTCACCATTA<br>AGGAC                                                                                                            | This study |
| pSR F_HindIII | ggaacggtattagaagcttACTCCCCATCCCCTC                                                                                                                             | This study |
| pSR R_XhoI    | caaaaaacaactcgagTTGAAGACGAAAGGGCCT                                                                                                                             | This study |
| comK pSR F    | cgtcttcaactcgagTTGTTTTTTGCGTGTTGCCG                                                                                                                            | This study |
| comK pSR R    | gggagtaagcttCTAATACCGTTCCCCGAGCTC                                                                                                                              | This study |
| pSR F_XhoI    | CTCGAGACTCCCCATCCCCTCCAGT                                                                                                                                      | This study |
| pSR R_EcoRI   | GAATTCCTTGAAGACGAAAGGGCC                                                                                                                                       | This study |
| qoxA pSR F    | cctttcgtcttcaagaattcAAAATGAAATTTTTGATTGACC<br>TAAG                                                                                                             | This study |
| qoxA pSR R    | aggggatggggagtctcgagTCATTCTTCTGTATCATCAGAC<br>TTC                                                                                                              | This study |
| yddK pSR F    | cctttcgtcttcaagaattcTACATTAATTGTATTATGTCAG<br>AATAAC                                                                                                           | This study |

|                     |                                                                    |            |
|---------------------|--------------------------------------------------------------------|------------|
| <i>yddK</i> pSR R   | aggggatggggagtctcgagTTATTTTAAATTCGTATTAAAT<br>TTAGCC               | This study |
| <i>ynaB</i> pSR F   | cctttcgtcttcaagaattcAGGATTGGGTTTCCTTATGGCT<br>CAAC                 | This study |
| <i>ynaB</i> pSR R   | aggggatggggagtctcgagTATTCTGAAACCAGTTTATAAT<br>ACTCTTGGAGATTC       | This study |
| <i>yydD</i> pSR F   | cctttcgtcttcaagaattcGTGATTGTTATGATTATAAAAA<br>ATCTTTTTG            | This study |
| <i>yydD</i> pSR R   | aggggatggggagtctcgagTCAAAATCTAAAACCAAAAAAT<br>CTATTTTTATC          | This study |
| pET21/ <i>rok</i> F | atcagcaaacgaactcgagCACCACCACCACCACACTGAGA<br>TC                    | This study |
| pET21/ <i>rok</i> R | tttcattaacatggatccGCGACCCATTTGCTGTCCACCAG<br>T                     | This study |
| <i>rok</i> F        | ggtcgcggatccATGTTTAAATGAAAGAGAAGCTTTGCGCTTG                        | This study |
| <i>rok</i> R        | gtggtgctcgagTTCGTTTGCTGATTCTGCAGATTTCGATTTC                        | This study |
| pDR111 F            | ctggacgattaaAGTCGACAGCTAGCCGCATG                                   | This study |
| pDR111 R            | gttttgctccatagtagttcctccttatgtAAGCTTAATTGT<br>TATCCGCTCACAAATTACAC | This study |
| <i>rpoD</i> F       | aacaattaagctt <u>acataaggaggaactact</u> ATGGAGCAAAA<br>CCCGCAGTC   | This study |
| <i>rpoD</i> R       | ctagctgtcgactTTAATCGTCCAGGAAGCTACG                                 | This study |
| H-NS promoter F     | GAGCTCGGTACCCGGGGATCtctctggctaattttatgaaa                          | This study |
| H-NS promoter R     | GCTTCTCTTTCATTAAACATtgtagtaatctcaaacttat                           | This study |
| <i>rok.1</i> F      | ataagtttgagattactacaATGTTTAAATGAAAGAGAAGC                          | This study |
| <i>rok.1</i> R      | caagtgcaatctacaaaagaTTATTCGTTTGCTGATTCTG                           | This study |
| pUC19 F             | tttcataaaaattagccagaaGATCCCCGGGTACCGAGCTC                          | This study |
| pUC19 R             | CAGAATCAGCAAACGAATAAAtctttttagattgcacttg                           | This study |

<sup>1</sup>Restriction sites are italicised. Promoter -35 and -10 elements are underlined.

<sup>2</sup>Optimal ribosome binding sites introduced by the oligonucleotides are underlined. Lowercase sequence denotes complementary sequences for Gibson assembly.
