# Supplementary material for: Xenogeneic silencing strategies in bacteria are dictated by RNA polymerase promiscuity
Source: PubMed Central journal article supplement (PMC8894471; doi:10.1038/s41467-022-28747-1), 2022-03-03
Supplement: 41467_2022_28747_MOESM4_ESM.pdf [file 41467_2022_28747_MOESM4_ESM.pdf]

**Title:** Supplementary Data 1.

**Description:** Positions of transcription start sites (TSSs) in *E. coli* and *B. subtilis* strains. Numbers refer to the chromosomal position and + or - symbols the DNA strand. Strains are indicated.

**Title:** Supplementary Data 2.

**Description:** Changes in gene expression detected by RNAseq in *Escherichia coli* or *Bacillus subtilis* lacking *hns* or *rok* respectively.

**Title:** Supplementary Data 3.

**Description:** Boundaries of genomic regions classed as HNS bound, Rok, bound, AT-rich Islands, or horizontally acquired.
